# Supplementary material for: Recurrence of cervical cancer and its resistance to progestin therapy in a mouse model
Source: PubMed Central journal article supplement (PMC5356807; doi:10.18632/oncotarget.13676), 2016-11-29
Supplement: oncotarget-08-2372-s001.pdf [file oncotarget-08-2372-s001.pdf]

## Recurrence of cervical cancer and its resistance to progestin therapy in a mouse model

### Supplementary Materials

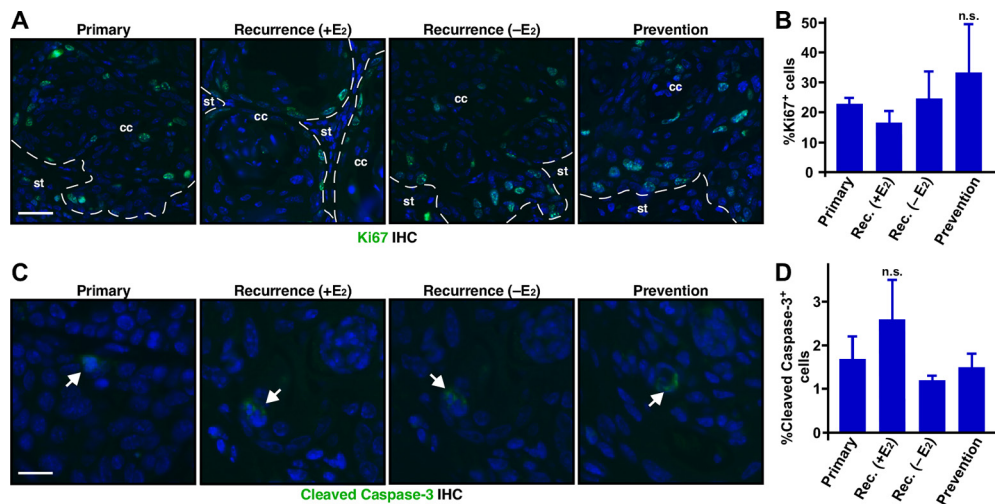

#### Supplementary Figure S1: E<sub>2</sub> and MPA do not influence expression of Ki67 and cleaved caspase-3 during recurrence.

(A) Cervical cancer sections were stained for proliferation marker Ki67 (green). Nuclei are shown in blue. Dotted lines separate cervical cancer (cc) from stroma (st). Scale bar, 30  $\mu$ m. (B) Results shown in A. was quantified and shown as mean  $\pm$  S.E.M. ( $n = 3$ ). n.s., not significant. (C) Cervical cancer sections were stained for apoptosis marker cleaved caspase-3 (green). Nuclei are shown in blue. Scale bar, 15  $\mu$ m. (D) Results shown in C. was quantified and shown as mean  $\pm$  S.E.M. ( $n = 3$ ). n.s., not significant.

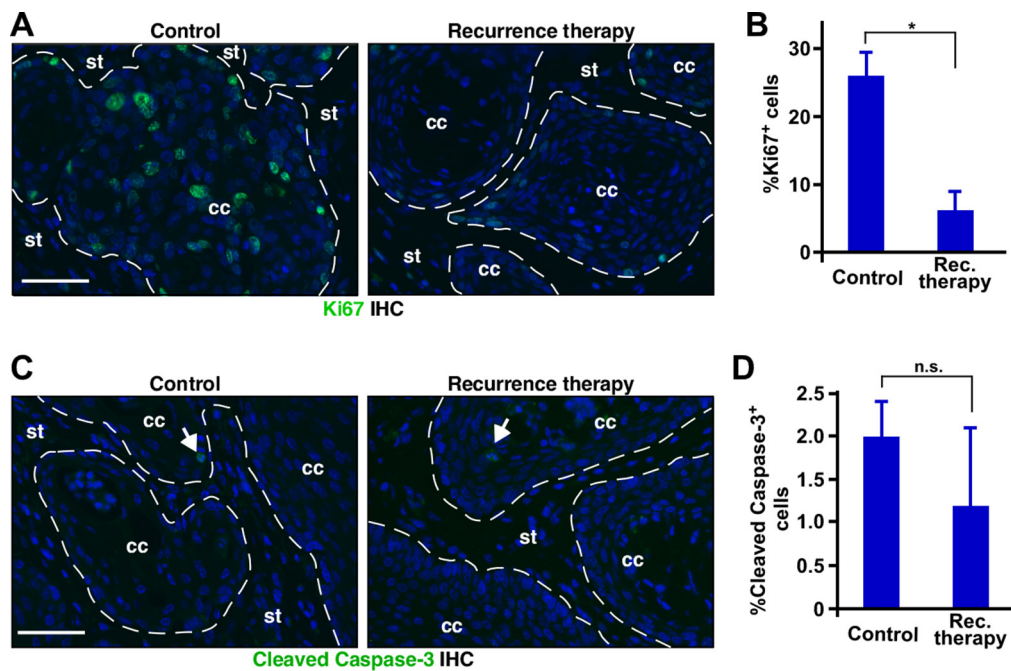

**Supplementary Figure S2: MPA decreases expression of Ki67 in recurrent cervical cancer.** (A) Cervical cancer sections were stained for proliferation marker Ki67 (green). Nuclei are shown in blue. Dotted lines separate cervical cancer (cc) from stroma (st). Scale bar, 50  $\mu$ m. (B) Results shown in A. was quantified and shown as mean  $\pm$  S.E.M. ( $n = 3$ ).  $P = 0.05$ . (C) Cervical cancer sections were stained for apoptosis marker cleaved caspase-3 (green). Nuclei are shown in blue. Dotted lines separate cervical cancer (cc) from stroma (st). Scale bar, 50  $\mu$ m. (D) Results shown in C. was quantified and shown as mean  $\pm$  S.E.M. ( $n = 3$ ). n.s., not significant.

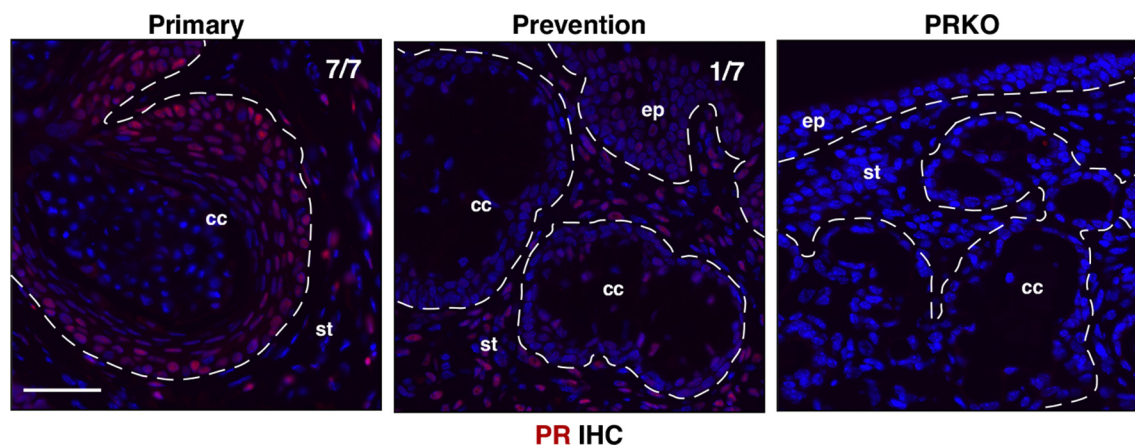

**Supplementary Figure S3: PR expression is reduced in one cervical cancer recurred in the presence of MPA.** Seven cervical cancers per group were stained for PR (red) as in Figure 5A. Note that reduced PR expression was observed in 1 of 7 cancers we analyzed in the prevention group. Dotted lines separate cervical cancer (cc) from stroma (st). PRKO is *K14E7/Pgr<sup>-/-</sup>*. Scale bar, 50  $\mu$ m.
